# Supplementary material for: Applying DNA Barcodes to Identify Closely Related Species of Ferns: A Case Study of the Chinese Adiantum (Pteridaceae)
Source: PubMed Central journal article supplement (PMC5014338; doi:10.1371/journal.pone.0160611), 2016-09-07
Supplement: pone.0160611.s011.pdf [file pone.0160611.s011.pdf]

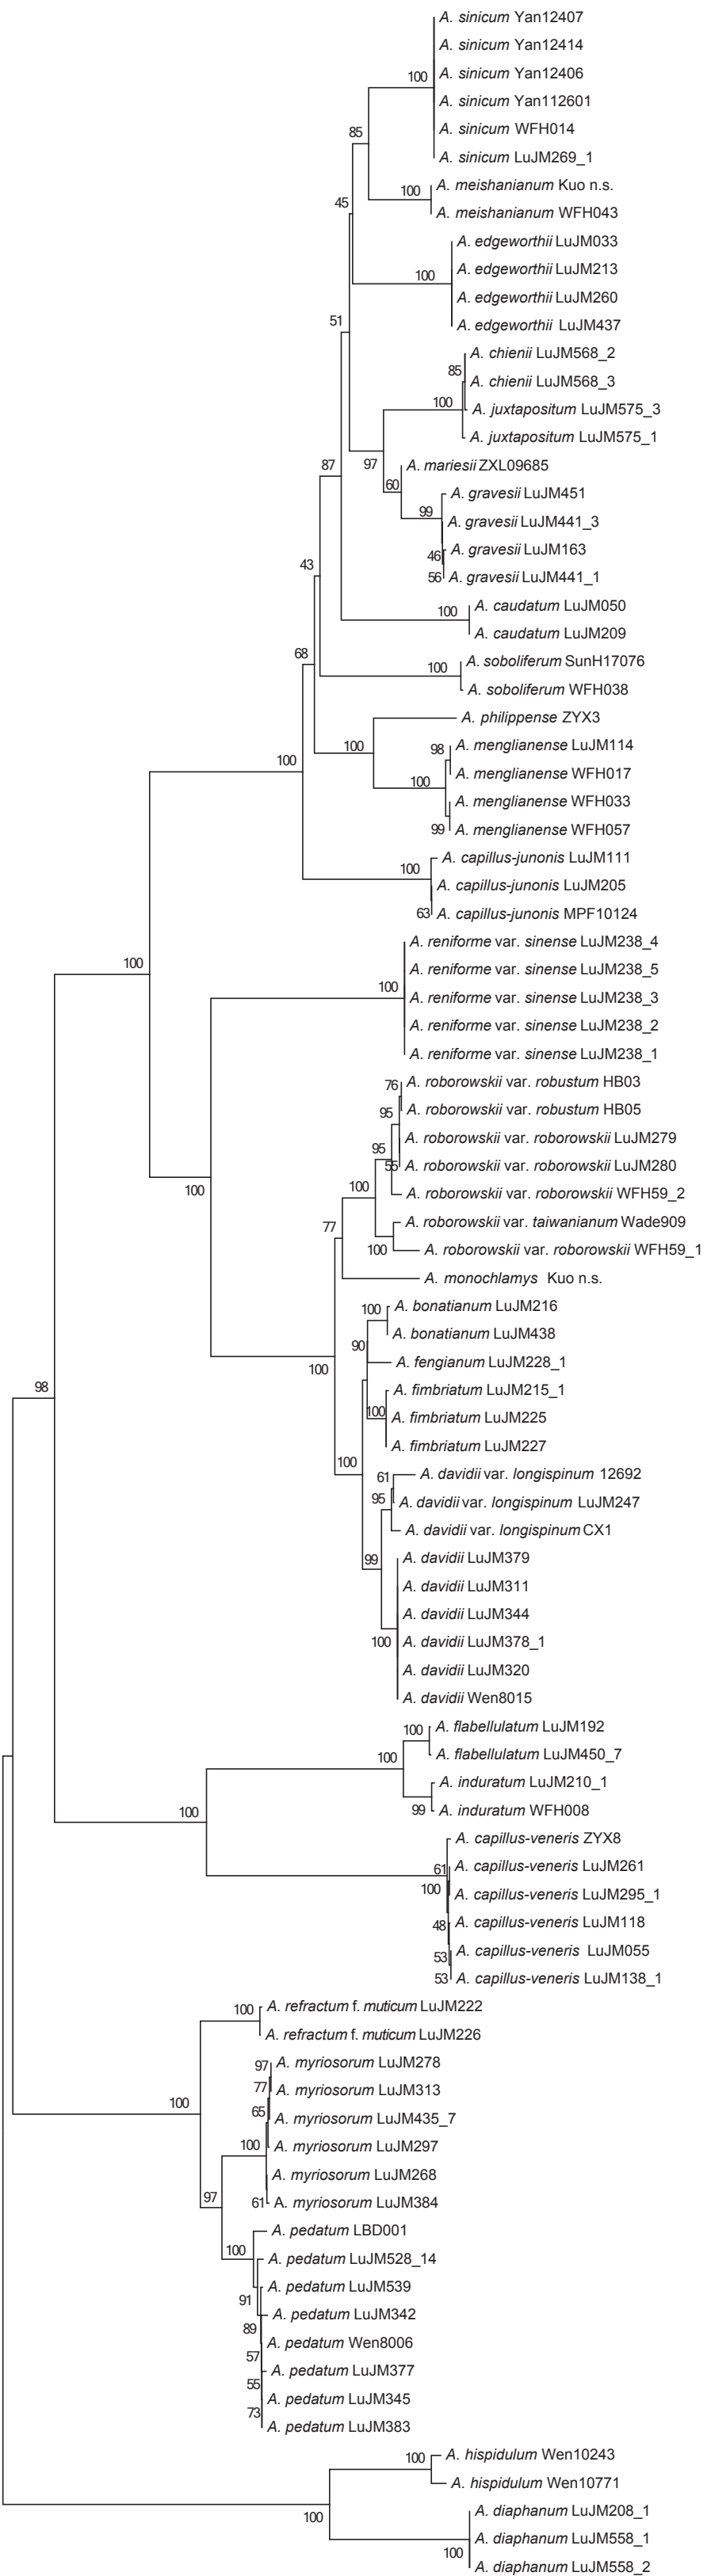

0.02
